# Supplementary material for: Many-to-many transfer of LIBS spectra across multiple experimental conditions
Source: Royal Society of Chemistry journal article supplement (doi:10.1039/d5ja00401b), 2026-01-01
Supplement: d5ja00401b2.pdf [file d5ja00401b2.pdf]

## Appendix

For each condition  $\mathcal{D}_c = \{(x_i, y_i)\}_{i=1}^{N_c}$ , where  $x_i$  denotes the spectra and  $y_i$  the corresponding target property, we trained a separate one-dimensional convolutional neural network (1D CNN). The input to the network consisted of spectra of length 4996. The architecture began with a batch-normalization layer applied to the input, followed by two convolutional blocks: Conv1D with 2 channels, kernel size 3, and stride 1, followed by average pooling with a factor of 2; and Conv1D with 4 channels, kernel size 3, and stride 2, followed again by average pooling with a factor of 2. The convolutional features were passed to four fully connected layers of sizes 2048, 1024, 512, and 128, each with Leaky ReLU activations and dropout ( $p = 0.1$ ). The final output was produced by separate linear layers ( $128 \rightarrow 1$ ) for each elemental concentration.

Training was performed using the Adam optimizer with a learning rate of 0.001, combined with a cosine annealing scheduler over 40 epochs. We used a batch size of 128 and mean squared error (MSE) as the loss function. The dataset was split into 80% training, 10% validation, and 10% test sets. Spectral preprocessing included clipping values below zero, normalizing total emissivity, and standardizing the input, while target properties were also standardized.

Predictions on transferred spectra were obtained as

$$y_{\text{transf}} = f_{\text{CNN}_e}(F(x, c, c')),$$

where  $F(x, c, c')$  denotes the transfer model. For clarity, condition-specific notation has been omitted.
